# Supplementary material
Source: PubMed Central journal article supplement (PMC8847245)
Supplement: NIHMS1746420-supplement-003468_-_Supplemental_Material.pdf [file NIHMS1746420-supplement-003468_-_Supplemental_Material.pdf]

## SUPPLEMENTAL MATERIAL

### Supplemental Methods

#### *Study Population and Design*

The SPRINT was a multicenter, open-label, parallel-arm, randomized clinical trial conducted between November 2010 and March 2013 at 102 clinical sites (organized into five clinical center networks) in the United States and Puerto Rico.<sup>53, 54</sup> The SPRINT randomized 9,361 hypertensive participants aged  $\geq 50$  years to either standard (treatment to systolic blood pressure  $< 140$  mmHg) or intensive (treatment to systolic blood pressure  $< 120$  mmHg) blood pressure management.<sup>53, 54</sup> The study protocol was approved by the local Institutional Review Boards at the respective trial sites. Written informed consent was obtained from all participants. The study complied with principles detailed in the Declaration of Helsinki. The detailed inclusion and exclusion criteria of the SPRINT have been previously described.<sup>53, 54</sup> Participants enrolled in the SPRINT trial were  $\geq 50$  years of age, with no history of diabetes, stroke, and with systolic blood pressure of 130-180 mmHg and increased risk of cardiovascular events. The higher risk of increased cardiovascular events was defined as having at least one of the following criteria: age  $\geq 75$  years, Framingham risk score of  $\geq 15\%$ , clinical or subclinical cardiovascular disease, or chronic kidney disease. Subclinical cardiovascular disease was defined as having an ankle-brachial index  $\leq 0.90$ , left ventricular hypertrophy by electrocardiography or other cardiac imaging in the two years prior to enrollment, or coronary artery calcium score of  $\geq 400$  Agatston units. Clinical cardiovascular disease was defined as having a history of myocardial infarction, percutaneous coronary intervention, coronary artery bypass grafting, carotid endarterectomy, carotid stenting, peripheral arterial disease with revascularization, acute coronary syndrome with

or without electrocardiographic changes, abdominal aortic aneurysm  $\geq 5$  cm, or 50% diameter stenosis of a coronary, carotid, or lower extremity artery.

This study included self-identified non-Hispanic Black participants and non-Hispanic White participants from the SPRINT who were free of diabetes at baseline. We excluded individuals with fasting blood glucose  $\geq 126$  mg/dL ( $\geq 6.99$  mmol/L) at baseline and those with missing blood glucose at baseline. Genetic ancestry data were collected in a subset of self-identified non-Hispanic Black SPRINT participants who consented to molecular genetic analyses.<sup>55, 56</sup> In our analysis of genetic ancestry proportion with incident diabetes mellitus, we included self-identified non-Hispanic Black SPRINT participants with genetic European ancestry proportion data available and who were free of diabetes at baseline (N=2,466).

### *Measures*

The sociodemographic data, including self-reported race/ethnicity, were collected by trained study personnel at both randomization and subsequent study visits. The laboratory parameters were collected at baseline, year 2, year 4, and the closeout visit. The blood glucose was estimated by using the hexokinase method on a Roche analyzer in stored samples at the central laboratory. Only fasting blood glucose results were deemed acceptable for the ascertainment of the study outcome. A detailed medical history, including the diagnosis of diabetes and the use of glucose-lowering medications, was collected annually during the study period. The baseline estimated glomerular filtration rate (eGFR) was computed using the modification of diet in renal disease 4-component equation.

### *Genotyping and Ancestry Proportion Estimation*

Genotyping was performed on genetic samples obtained from consenting participants. The investigators utilized 106 biallelic ancestry informative markers (AIMs) to compute the European ancestry proportion (**Supplementary Table I**).<sup>24, 56, 57</sup> The genotypic data for these AIMs were obtained from 44 HapMap Yoruba individuals (Yoruba in Ibadan, Nigeria), with 39 European American controls serving as a reference.<sup>56, 57</sup> The AIMs represent the continental ancestry, and the AIMs for Yoruba individuals are specific for Western and Central Africa, and are deemed to be representative of the ancestry for most of the Black American population.<sup>57</sup> The previously validated methodology of genetic ancestry estimation utilizing the maximum likelihood approach using frequentist estimation of individual ancestry proportion (FRAPPE) was used for estimating the European and African ancestry proportion.<sup>24, 56-60</sup> The principal component analysis plot of the AIMs with the European and African populations in the 1000 Genomes project assessed using PLINK 2.0 and plotted using R 4.1.0 (R Core Team, Vienna) is demonstrated in **Supplementary Figure I**.

### *Outcomes*

The outcome of interest in this study was the development of incident diabetes mellitus. As previously described,<sup>61</sup> this was defined as fasting blood glucose  $\geq 126$  mg/dL ( $\geq 6.99$  mmol/L), self-reported diabetes mellitus, or the new use of glucose-lowering medications at the annual examinations. As previously described, if the participant's blood sample was labeled as non-fasting, the fasting blood glucose was deemed as missing for this analysis.<sup>61</sup>

### *Statistical Analyses*

The baseline characteristics were compared using descriptive statistics. Continuous variables were summarized using medians and interquartile ranges and then compared using the Wilcoxon rank-sum test or Jonckheere-Terpstra test. Categorical variables were summarized as counts and frequencies and compared using the Chi-Square test or Cochran-Armitage test. In the secondary analysis across race, the cumulative incidence rate (per 1000-person years) of diabetes mellitus among non-Hispanic Black participants and non-Hispanic White participants was computed using Poisson regression. The log-rank test and multivariable-adjusted Cox proportional hazard models were used to estimate the risk of incident diabetes mellitus stratified by the racial groups. The proportional hazard assumption was assessed using Schoenfeld residuals. The follow-up duration was censored after participants reached the study outcome, died, were deemed to have been lost to follow-up or at study closeout. Chi-square values from multivariable-adjusted Cox models with and without the respective covariates were used to rank the relative strength of association of the various clinical and social factors with incident diabetes mellitus. They were then compared using the likelihood ratio test, as previously described.<sup>62, 63</sup> Based on previously reported sex-related differences in the race-stratified incident and prevalent diabetes mellitus, we assessed the interaction between sex and race (non-Hispanic White or non-Hispanic Black participants) on incident diabetes mellitus using multiplicative interaction term (race\*sex).<sup>5, 13</sup>

Black participants free of diabetes at baseline, who consented for genetic analyses, had their DNA analyzed, and had their ancestry proportions available (N=2,466) were stratified into tertiles of European ancestry. We assessed the multivariable-adjusted relationship between genetic European ancestry proportion and metabolic syndrome components (body mass index

[BMI], triglyceride levels, HDL-C levels, fasting blood glucose, and systolic/diastolic blood pressure) among non-Hispanic Black individuals. We used BMI because waist-hip ratio measurements, which are traditionally used to assess metabolic syndrome, were not available in the study population. We assessed the non-linearity of association as previously described, using the `testnl` command in STATA.<sup>64</sup> We used restricted cubic splines to depict the non-linear relationship.<sup>64</sup>

Poisson regression was used to estimate the incidence rate (per 1000-person years) of diabetes mellitus across the genetic European ancestry tertiles among non-Hispanic Black individuals. Restricted cubic splines were used to evaluate the continuous relationship of European ancestry proportion and incidence of diabetes mellitus. The risk of incident diabetes mellitus among non-Hispanic Black individuals was estimated across the tertiles of European ancestry proportion using the log-rank test and multivariable-adjusted Cox regression models. The risk of incident diabetes was also assessed for every 5% increment in European ancestry proportion. All of the abovementioned models were adjusted for age, sex, BMI, baseline blood glucose, treatment arm, clinical or subclinical cardiovascular disease, serum creatinine, aspirin use, statin use, urine albumin-creatinine ratio, HDL-C, triglyceride levels, low-density lipoprotein cholesterol (LDL-C), total cholesterol, randomization site, health insurance status, employment status, and education status. The interaction between European ancestry and treatment arm (intensive versus standard) on incident diabetes mellitus was estimated using a multiplicative-interaction term (tertile\*treatment arm). We also assessed the interaction between European ancestry and sex on incident diabetes mellitus (tertile\*sex). The ranking of the relative

strength of association of the various clinical and social factors with incident diabetes mellitus within non-Hispanic Black individuals was also performed.

We performed sensitivity analyses to estimate the risk of incident diabetes mellitus stratified by racial groups and across European ancestry proportion tertiles among Black individuals by taking death as a competing event.<sup>65</sup> We also performed post-hoc sensitivity analyses by using age as the time-scale in Cox regression models instead of the follow-up period.

All statistical analyses were completed using SAS 9.4 (Cary, NC) and STATA SE 16.0 (College Station, TX) in December 2020. A two-sided type I error of 0.05 was used to ascertain statistical significance. The primary analysis of the study was the risk of incident diabetes mellitus across ancestry proportion tertiles, and the remaining are secondary analyses. Hence, the type I error has not been adjusted for multiple comparisons.

**Supplementary Table I. Reference SNP Numbers for the Ancestry Informative Markers**

| <b>Ancestry Informative Markers: Reference SNP Numbers</b> |
|------------------------------------------------------------|
| rs1240709                                                  |
| rs1739897                                                  |
| rs630101                                                   |
| rs2339475                                                  |
| rs975612                                                   |
| rs935925                                                   |
| rs4596126                                                  |
| rs1039524                                                  |
| rs3846193                                                  |
| rs758973                                                   |
| rs1525760                                                  |
| rs930072                                                   |
| rs3317                                                     |
| rs185493                                                   |
| rs3024354                                                  |
| rs3734693                                                  |
| rs1029122                                                  |
| rs1480642                                                  |
| rs736946                                                   |
| rs362949                                                   |
| rs6928254                                                  |
| rs793979                                                   |
| rs742813                                                   |
| rs2965404                                                  |
| rs2740574                                                  |
| rs285                                                      |
| rs7845391                                                  |
| rs913258                                                   |
| rs2301550                                                  |
| rs803733                                                   |
| rs7349                                                     |
| rs992528                                                   |
| rs905552                                                   |
| rs7957445                                                  |
| rs4759816                                                  |
| rs895898                                                   |
| rs913607                                                   |
| rs179562                                                   |
| rs981270                                                   |

|           |
|-----------|
| rs2862    |
| rs1374092 |
| rs1557519 |
| rs7201030 |
| rs2891    |
| rs8082034 |
| rs1941141 |
| rs4436849 |
| rs2900918 |
| rs4884    |
| rs6034866 |
| rs6062548 |
| rs2064056 |
| rs4821667 |
| rs455726  |
| rs680273  |
| rs2814778 |
| rs6003    |
| rs2065160 |
| rs2752    |
| rs3287    |
| rs3340    |
| rs2763    |
| rs2161    |
| rs3176921 |
| rs1042602 |
| rs1800498 |
| rs1800404 |
| rs4646    |
| rs2228478 |
| rs2816    |
| rs344454  |
| rs554362  |
| rs580897  |
| rs735480  |
| rs932327  |
| rs1006689 |
| rs1041931 |
| rs1184089 |
| rs1259448 |
| rs1431479 |



|            |
|------------|
| rs2407582  |
| rs2416791  |
| rs2426515  |
| rs3745099  |
| rs4811651  |
| rs5752014  |
| rs6007220  |
| rs6491743  |
| rs6510761  |
| rs7084970  |
| rs7689126  |
| rs7689609  |
| rs7908735  |
| rs7978988  |
| rs8106013  |
| rs9510171  |
| rs9525462  |
| rs9542741  |
| rs9626698  |
| rs9977149  |
| rs10884277 |
| rs11064432 |
| rs11112724 |
| rs11698339 |
| rs13148562 |
| rs17614025 |

**Supplementary Table II. Baseline Characteristics of Study Population: Stratified by Race.**

| Characteristics                                        | Non-Hispanic Blacks<br>(N=2,673) | Non-Hispanic Whites<br>(N=5,256) | P-value |
|--------------------------------------------------------|----------------------------------|----------------------------------|---------|
| Age                                                    | 63 (57-71)                       | 70 (64-77)                       | <.001   |
| Age ≥ 75 years                                         | 435 (16.3)                       | 1,927 (36.7)                     | <.001   |
| Age ≥ 65 years                                         | 1,105 (41.4)                     | 3,733 (71.0)                     | <.001   |
| Female                                                 | 1,212 (45.3)                     | 1,514 (28.8)                     | <.001   |
| Cardiovascular Disease                                 | 438 (16.4)                       | 1175 (22.4)                      | <.001   |
| Clinical                                               | 293 (10.9)                       | 1073 (20.4)                      | <.001   |
| Subclinical                                            | 192 (7.18)                       | 199 (3.79)                       | <.001   |
| Framingham 10-year CHD Risk Score                      | 18.9 (13.1-27.8)                 | 24.4 (17.3-33.89)                | 0.42    |
| Framingham 10-year CHD risk ≥15%                       | 1,774 (66.4)                     | 4,322 (82.2)                     | <.001   |
| Body Mass Index (kg/m <sup>2</sup> )                   | 29.9 (26.6-34.3)                 | 28.5 (25.6-32.2)                 | <.001   |
| Systolic Blood Pressure (mmHg)                         | 139 (129-150)                    | 138 (129-149)                    | 0.42    |
| Diastolic Blood Pressure (mmHg)                        | 81 (73-90)                       | 77 (69-84)                       | <.001   |
| Fasting Plasma Glucose (mg/dL)                         | 95 (88-103)                      | 98 (91-105)                      | <.001   |
| Total Cholesterol (mg/dL)                              | 193 (169-220)                    | 182 (157-211)                    | <.001   |
| LDL Cholesterol (mg/dL)                                | 117 (94-140)                     | 105 (84-129)                     | <.001   |
| HDL Cholesterol (mg/dL)                                | 53 (45-63)                       | 50 (42-60)                       | <.001   |
| Triglycerides (mg/dL)                                  | 91 (68-126)                      | 110 (80-155)                     | <.001   |
| Serum Creatinine (mg/dL)                               | 1.06 (0.89-1.28)                 | 1.01 (0.87-1.20)                 | <.001   |
| Urine Albumin to Creatinine Ratio (mg/gm)              | 9.1 (5.1-21.8)                   | 9.7 (5.9-21.5)                   | <.001   |
| Estimated GFR (mL/min/1.73m <sup>2</sup> )             | 76.4 (61.6-90.8)                 | 67.7 (55.8-79.6)                 | <.001   |
| CKD (eGFR <60 mL/min/1.73m <sup>2</sup> )              | 613 (22.9)                       | 1742 (33.1)                      | <.001   |
| CKD Stage IIIa (eGFR 45-59 mL/min/1.73m <sup>2</sup> ) | 389 (14.6)                       | 1175 (22.4)                      | <.001   |
| CKD Stage IIIb (eGFR 30-59 mL/min/1.73m <sup>2</sup> ) | 167 (6.3)                        | 494 (9.4)                        |         |
| CKD Stage IV (eGFR 15-29 mL/min/1.73m <sup>2</sup> )   | 58 (2.2)                         | 74 (1.4)                         |         |

|                                  |              |              |       |
|----------------------------------|--------------|--------------|-------|
| Aspirin Use                      | 1,099 (41.2) | 3,087 (58.8) | <.001 |
| Statin Use                       | 894 (33.7)   | 2,587 (49.6) | <.001 |
| Antihypertensive Medications     | 2 (1-3)      | 2 (1-2)      | <.001 |
| Smoking Status                   |              |              |       |
| Never                            | 1159 (43.4)  | 2199 (41.8)  | <.001 |
| Former                           | 895 (33.5)   | 2601 (49.5)  |       |
| Current                          | 615 (23.0)   | 451 (8.6)    |       |
| Education                        |              |              |       |
| Less than High School            | 932 (34.8)   | 943 (17.9)   | <.001 |
| High School or GED               | 269 (10.1)   | 373 (7.1)    |       |
| Business or Vocational Training  | 635 (23.8)   | 1,096 (20.9) |       |
| Some College or Associate Degree | 453 (17.0)   | 1,211 (23.0) |       |
| College Graduate                 | 306 (11.5)   | 1,232 (23.4) |       |
| Doctoral or Masters Degree       | 79 (3.0)     | 401 (7.6)    |       |
| Employment                       |              |              |       |
| Full Time                        | 563 (21.8)   | 1,090 (21.1) | <.001 |
| Part Time                        | 230 (8.9)    | 386 (7.5)    |       |
| Retired                          | 1,355 (52.4) | 3,468 (67.0) |       |
| Looking for Employment           | 125 (4.8)    | 57 (1.1)     |       |
| Unemployed                       | 313 (12.1)   | 173 (3.3)    |       |
| Lack of Health Insurance         | 491 (18.4)   | 297 (5.7)    | <.001 |

Categorical variables are represented as counts with proportions, and continuous variables are represented as medians with interquartile ranges. **Abbreviations:** GFR: Glomerular Filtration Rate; CKD: Chronic Kidney Disease; HDL: High-Density Lipoprotein; LDL: Low-Density Lipoprotein; CHD: Coronary Heart Disease.

**Supplementary Table III. Hazard Ratio for Risk of Incident Diabetes Between Racial Groups in the Multivariable-Adjusted Model**

| <b>Variables Included in Model</b>    | <b>Hazard Ratio (95% Confidence Interval)</b> |
|---------------------------------------|-----------------------------------------------|
| <b>Race (Black)</b>                   | 1.43 (1.14-1.80)                              |
| <b>Total Cholesterol</b>              | 1.50 (0.20-3.00)                              |
| <b>Clinical/Subclinical CVD</b>       | 1.30 (1.04-1.60)                              |
| <b>Smoking</b>                        |                                               |
| <b>Never</b>                          | Ref.                                          |
| <b>Former</b>                         | 1.20 (1.01-1.43)                              |
| <b>Current</b>                        | 1.30 (1.01-1.68)                              |
| <b>Triglycerides</b>                  | 1.28 (0.85-1.94)                              |
| <b>Treatment Arm</b>                  | 1.21 (0.98-1.43)                              |
| <b>Aspirin Use</b>                    | 1.13 (0.94-1.35)                              |
| <b>Statin Use</b>                     | 1.10 (0.91-1.32)                              |
| <b>Employment</b>                     |                                               |
| <b>Full Time</b>                      | Ref.                                          |
| <b>Part-Time</b>                      | 1.07 (0.78-1.47)                              |
| <b>Retired</b>                        | 0.95 (0.76-1.18)                              |
| <b>Looking for Employment</b>         | 0.92 (0.55-1.53)                              |
| <b>Unemployed</b>                     | 0.91 (0.65-1.27)                              |
| <b>Health Insurance</b>               | 0.86 (0.65-1.12)                              |
| <b>BMI</b>                            | 1.05 (1.03-1.06)                              |
| <b>Age</b>                            | 1.04 (1.02-1.05)                              |
| <b>Blood Glucose</b>                  | 1.01 (0.95-1.07)                              |
| <b>Urine Albumin-Creatinine Ratio</b> | 1.00 (0.97-1.05)                              |
| <b>Randomization Site</b>             | 1.00 (0.98-1.01)                              |
| <b>LDL-C</b>                          | 0.93 (0.27-3.18)                              |
| <b>Sex</b>                            | 0.82 (0.66-1.02)                              |
| <b>Education Status</b>               |                                               |
| <b>Doctoral/Masters Degree</b>        | Ref.                                          |
| <b>College Graduate</b>               | 0.84 (0.56-1.27)                              |
| <b>Some College/Associate Degree</b>  | 0.98 (0.66-1.47)                              |
| <b>Business/Vocational Training</b>   | 0.86 (0.57-1.28)                              |
| <b>High School/GED</b>                | 0.83 (0.52-1.32)                              |
| <b>&lt;High School</b>                | 0.84 (0.60-1.30)                              |
| <b>S. Creatinine</b>                  | 0.80 (0.60-1.02)                              |
| <b>HDL-C</b>                          | 0.42 (0.20-0.88)                              |

**Abbreviations:** BMI: Body mass index; GFR: Glomerular Filtration Rate; CKD: Chronic Kidney Disease; HDL: High-Density Lipoprotein; LDL: Low-Density Lipoprotein; CVD: Cardiovascular Disease.

**Supplementary Table IV. Multivariable-Adjusted Competing Risk Analysis for Incident Diabetes**

| <b>Multivariable-Adjusted Competing Risk Analysis for Incident Diabetes</b>                                                                                                                                                                                                                                                                                                                                           |                              |
|-----------------------------------------------------------------------------------------------------------------------------------------------------------------------------------------------------------------------------------------------------------------------------------------------------------------------------------------------------------------------------------------------------------------------|------------------------------|
|                                                                                                                                                                                                                                                                                                                                                                                                                       | <b>Hazard Ratio (95% CI)</b> |
| <b>Comparison Between Non-Hispanic Black and Non-Hispanic White Individuals</b>                                                                                                                                                                                                                                                                                                                                       |                              |
| <b>Non-Hispanic White Participants</b>                                                                                                                                                                                                                                                                                                                                                                                | Ref.                         |
| <b>Non-Hispanic Blacks Participants</b>                                                                                                                                                                                                                                                                                                                                                                               | 1.50 (1.23-1.84)             |
| <b>Comparison Within Non-Hispanic Black Individuals</b>                                                                                                                                                                                                                                                                                                                                                               |                              |
| <b>European Ancestry Proportion Tertile</b>                                                                                                                                                                                                                                                                                                                                                                           |                              |
| <b>Tertile 1</b>                                                                                                                                                                                                                                                                                                                                                                                                      | Ref.                         |
| <b>Tertile 2</b>                                                                                                                                                                                                                                                                                                                                                                                                      | 0.69 (0.49-0.96)             |
| <b>Tertile 3</b>                                                                                                                                                                                                                                                                                                                                                                                                      | 0.67 (0.49-0.93)             |
| <b>Risk for Every 5% Increase in European Ancestry Proportion</b>                                                                                                                                                                                                                                                                                                                                                     | 0.74 (0.56-0.97)             |
| The models were adjusted for age, sex, BMI, baseline blood glucose, treatment arm, clinical or subclinical cardiovascular disease, serum creatinine, aspirin use, statin use, urine albumin-creatinine ratio, high-density lipoprotein-cholesterol, triglyceride levels, low-density lipoprotein cholesterol, total cholesterol, randomization site, health insurance status, employment status, and education status |                              |

Abbreviation: CI: Confidence Interval.

**Supplementary Table V. Multivariable-Adjusted Cox Regression for Incident Diabetes Taking Age on Time-Scale**

| <b>Multivariable-Adjusted Cox Regression for Incident Diabetes Taking Age on Time-Scale</b> |                              |
|---------------------------------------------------------------------------------------------|------------------------------|
|                                                                                             | <b>Hazard Ratio (95% CI)</b> |
| <b>Comparison Between Non-Hispanic Black and Non-Hispanic White Individuals</b>             |                              |
| <b>Non-Hispanic White Participants</b>                                                      | Ref.                         |
| <b>Non-Hispanic Blacks Participants</b>                                                     | 2.65 (2.19-3.21)             |
| <b>Comparison Within Non-Hispanic Black Individuals</b>                                     |                              |
| <b>European Ancestry Proportion Tertile</b>                                                 |                              |
| <b>Tertile 1</b>                                                                            | Ref.                         |
| <b>Tertile 2</b>                                                                            | 0.76 (0.55-1.06)             |
| <b>Tertile 3</b>                                                                            | 0.65 (0.47-0.89)             |
| <b>Risk for Every 5% Increase in European Ancestry Proportion</b>                           | 0.70 (0.56-0.88)             |
| <b>Competing Risk Analysis</b>                                                              |                              |
| <b>Comparison Between Non-Hispanic Black and Non-Hispanic White Individuals</b>             |                              |
| <b>Non-Hispanic White Participants</b>                                                      | Ref.                         |
| <b>Non-Hispanic Blacks Participants</b>                                                     | 2.47 (95% CI: 2.01-3.03)     |
| <b>Comparison Within Non-Hispanic Black Individuals</b>                                     |                              |
| <b>European Ancestry Proportion Tertile</b>                                                 |                              |
| <b>Tertile 1</b>                                                                            | Ref.                         |
| <b>Tertile 2</b>                                                                            | 0.78 (0.55-1.10)             |

|                                                                                                                                                                                                                                                                                                                                                                                                                   |                  |
|-------------------------------------------------------------------------------------------------------------------------------------------------------------------------------------------------------------------------------------------------------------------------------------------------------------------------------------------------------------------------------------------------------------------|------------------|
| <b>Tertile 3</b>                                                                                                                                                                                                                                                                                                                                                                                                  | 0.66 (0.47-0.94) |
| <b>Risk for Every 5% Increase in European Ancestry Proportion</b>                                                                                                                                                                                                                                                                                                                                                 | 0.70 (0.56-0.88) |
| The models were adjusted for sex, BMI, baseline blood glucose, treatment arm, clinical or subclinical cardiovascular disease, serum creatinine, aspirin use, statin use, urine albumin-creatinine ratio, high-density lipoprotein-cholesterol, triglyceride levels, low-density lipoprotein cholesterol, total cholesterol, randomization site, health insurance status, employment status, and education status. |                  |

Abbreviation: CI: Confidence Interval.

**Supplementary Table VI. Baseline Characteristics: Stratified by Inclusion in Current Analysis.**

| <b>Characteristics</b>                                 | <b>Black Participants with Ancestry Proportion Data Available (N=2,466)</b> | <b>Remaining SPRINT Participants (N=6,895)</b> | <b>P-value</b> |
|--------------------------------------------------------|-----------------------------------------------------------------------------|------------------------------------------------|----------------|
| Age                                                    | 63 (57-71)                                                                  | 69 (62-77)                                     | <.001          |
| Age ≥ 75 years                                         | 403 (16.3)                                                                  | 2,233 (32.4)                                   | <.001          |
| Age ≥ 65 years                                         | 1,026 (41.6)                                                                | 4,530 (65.7)                                   | <.001          |
| Female                                                 | 1,124 (45.6)                                                                | 2,208 (32.0)                                   | <.001          |
| Cardiovascular Disease                                 | 409 (16.6)                                                                  | 1468 (21.3)                                    | <.001          |
| Clinical                                               | 272 (11.0)                                                                  | 1290 (18.7)                                    | <.001          |
| Subclinical                                            | 181 (7.3)                                                                   | 312 (4.5)                                      | <.001          |
| Framingham 10-year CHD Risk Score                      | 18.9 (13.1-27.8)                                                            | 23.6 (16.3-33.0)                               | <0.001         |
| Framingham 10-year CHD risk ≥15%                       | 1,630 (66.1)                                                                | 5,472 (79.4)                                   | <.001          |
| Body Mass Index (kg/m <sup>2</sup> )                   | 30.0 (26.5-34.3)                                                            | 28.7 (25.8-32.4)                               | <.001          |
| Systolic Blood Pressure (mmHg)                         | 139 (129-149)                                                               | 138 (130-149)                                  | 0.74           |
| Diastolic Blood Pressure (mmHg)                        | 81 (73-90)                                                                  | 77 (69-85)                                     | <.001          |
| Fasting Plasma Glucose (mg/dL)                         | 95 (88-102)                                                                 | 98 (91-106)                                    | <.001          |
| Total Cholesterol (mg/dL)                              | 194 (169-220)                                                               | 184 (158-213)                                  | <.001          |
| LDL Cholesterol (mg/dL)                                | 118 (95-140)                                                                | 107 (85-130)                                   | <.001          |
| HDL Cholesterol (mg/dL)                                | 53 (45-63)                                                                  | 49 (42-59)                                     | <.001          |
| Triglycerides (mg/dL)                                  | 92 (68-126)                                                                 | 112 (81-159)                                   | <.001          |
| Serum Creatinine (mg/dL)                               | 1.06 (0.88-1.28)                                                            | 0.99 (0.85-1.18)                               | <.001          |
| Urine Albumin to Creatinine Ratio (mg/gm)              | 9.2 (5.1-22.6)                                                              | 9.7 (5.8-21.1)                                 | <.001          |
| Estimated GFR (mL/min/1.73m <sup>2</sup> )             | 76.2 (61.3-90.8)                                                            | 69.9 (57.3-82.3)                               | <.001          |
| CKD (eGFR <60 mL/min/1.73m <sup>2</sup> )              | 581 (23.6)                                                                  | 2065 (30.0)                                    | <.001          |
| CKD Stage IIIa (eGFR 45-59 mL/min/1.73m <sup>2</sup> ) | 365 (14.8)                                                                  | 1,394 (20.2)                                   | <.001          |
| CKD Stage IIIb (eGFR 30-59)                            | 161 (6.5)                                                                   | 575 (8.3)                                      |                |

|                                                      |              |              |       |
|------------------------------------------------------|--------------|--------------|-------|
| mL/min/1.73m <sup>2</sup> )                          |              |              |       |
| CKD Stage IV (eGFR 15-29 mL/min/1.73m <sup>2</sup> ) | 56 (2.3)     | 136 (2.0)    |       |
| Aspirin Use                                          | 1,019 (41.4) | 3,737 (54.4) | <.001 |
| Statin Use                                           | 827 (33.7)   | 3,227 (47.2) | <.001 |
| Antihypertensive Medications                         | 2 (1-3)      | 2 (1-2)      | <.001 |
| Smoking Status                                       |              |              |       |
| Never                                                | 1,072 (43.5) | 3,050 (44.2) | <.001 |
| Former                                               | 823 (33.4)   | 3,150 (45.7) |       |
| Current                                              | 568 (23.0)   | 672 (9.8)    |       |
| Education                                            |              |              |       |
| Less than High School                                | 866 (35.1)   | 1,448 (21.0) | <.001 |
| High School or GED                                   | 250 (10.1)   | 505 (7.3)    |       |
| Business or Vocational Training                      | 583 (23.6)   | 1,356 (19.7) |       |
| Some College or Associate Degree                     | 415 (21.0)   | 1,557 (22.6) |       |
| College Graduate                                     | 279 (11.3)   | 1,491 (21.6) |       |
| Doctoral or Masters Degree                           | 73 (3.0)     | 538 (7.8)    |       |
| Employment                                           |              |              |       |
| Full Time                                            | 518 (21.7)   | 1,475 (22.1) | <.001 |
| Part Time                                            | 217 (9.1)    | 512 (7.7)    |       |
| Retired                                              | 1,252 (52.5) | 4,319 (64.6) |       |
| Looking for Employment                               | 118 (5.0)    | 85 (1.3)     |       |
| Unemployed                                           | 280 (11.7)   | 298 (4.5)    |       |
| Lack of Health Insurance                             | 442 (17.9)   | 531 (7.7)    | <.001 |

Categorical variables are represented as counts with proportions, and continuous variables are represented as medians with interquartile ranges. **Abbreviations:** GFR: Glomerular Filtration Rate; CKD: Chronic Kidney Disease; HDL: High-Density Lipoprotein; LDL: Low-Density Lipoprotein; CVD: Cardiovascular Disease.



**Supplementary Table VII. Hazard Ratio for Risk of Incident Diabetes Across European Ancestry Tertiles in the Multivariable-Adjusted Model**

| <b>Variables Included in Model</b>    | <b>Hazard Ratio (95% Confidence Interval)</b> |
|---------------------------------------|-----------------------------------------------|
| <b>European Ancestry Tertile</b>      |                                               |
| Tertile 1                             | Ref.                                          |
| Tertile 2                             | 0.64 (0.45-0.90)                              |
| Tertile 3                             | 0.61 (0.44-0.89)                              |
| <b>Education Status</b>               |                                               |
| Doctoral/Masters Degree               | Ref.                                          |
| College Graduate                      | 2.17 (0.49-5.00)                              |
| Some College/Associate Degree         | 2.84 (0.67-5.00)                              |
| Business/Vocational Training          | 2.59 (0.61-5.00)                              |
| High School/GED                       | 2.26 (0.51-5.00)                              |
| <High School                          | 2.64 (0.63-5.00)                              |
| <b>LDL-C</b>                          | 1.96 (0.41-5.00)                              |
| <b>Triglycerides</b>                  | 1.62 (0.94-2.78)                              |
| <b>Clinical/Subclinical CVD</b>       | 1.32 (0.90-1.93)                              |
| <b>Smoking</b>                        |                                               |
| Never                                 | Ref.                                          |
| Former                                | 1.15 (0.83-1.61)                              |
| Current                               | 1.06 (0.72-1.56)                              |
| <b>Aspirin Use</b>                    | 1.13 (0.83-1.52)                              |
| <b>Blood Glucose</b>                  | 1.06 (1.05-1.07)                              |
| <b>BMI</b>                            | 1.04 (1.02-1.07)                              |
| <b>Age</b>                            | 1.02 (1.01-1.03)                              |
| <b>Statin Use</b>                     | 1.01 (0.74-1.38)                              |
| <b>Employment</b>                     |                                               |
| Full Time                             | Ref.                                          |
| Part-Time                             | 0.99 (0.56-1.74)                              |
| Retired                               | 1.02 (0.68-1.53)                              |
| <b>Looking for Employment</b>         | 0.99 (0.48-2.06)                              |
| Unemployed                            | 1.18 (0.72-1.95)                              |
| <b>Sex</b>                            | 0.82 (0.57-1.18)                              |
| <b>Urine Albumin-Creatinine Ratio</b> | 1.00 (0.97-1.01)                              |
| <b>Randomization Site</b>             | 1.00 (0.98-1.01)                              |
| <b>Total Cholesterol</b>              | 0.99 (0.98-1.01)                              |
| <b>Treatment Arm</b>                  | 0.92 (0.69-1.22)                              |
| <b>HDL-C</b>                          | 0.86 (0.31-2.39)                              |
| <b>Health Insurance</b>               | 0.80 (0.53-1.20)                              |
| <b>S. Creatinine</b>                  | 0.60 (0.36-1.03)                              |

**Abbreviations:** BMI: Body mass index; GFR: Glomerular Filtration Rate; CKD: Chronic Kidney Disease; HDL: High-Density Lipoprotein; LDL: Low-Density Lipoprotein; CVD: Cardiovascular Disease.

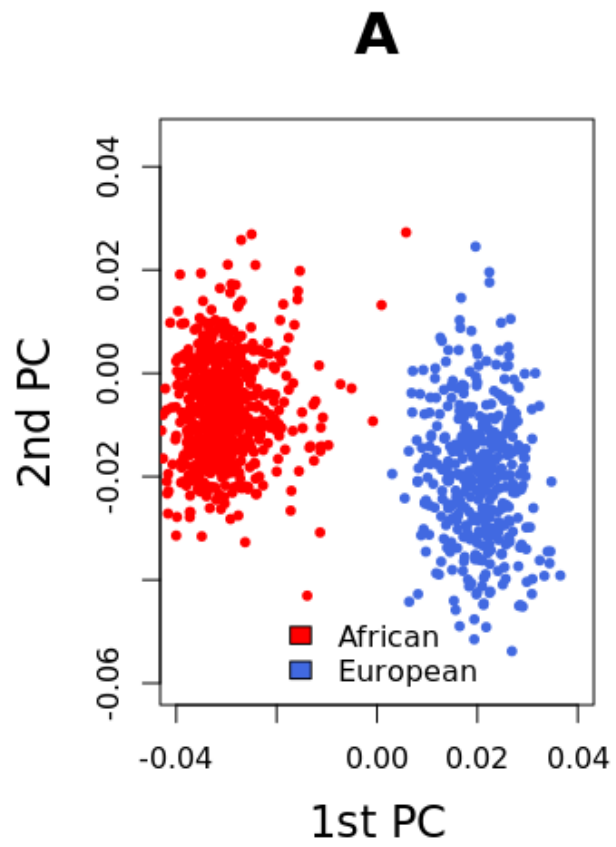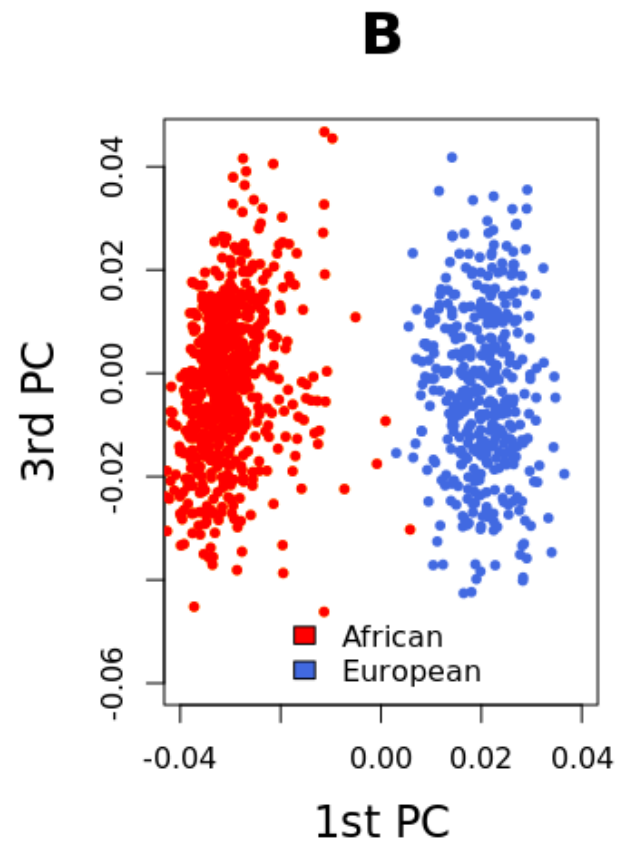

**Supplementary Figure I. Principal Component Analysis of Biallelic Ancestry Informative Markers in The 1000 Genomes Project**

**A**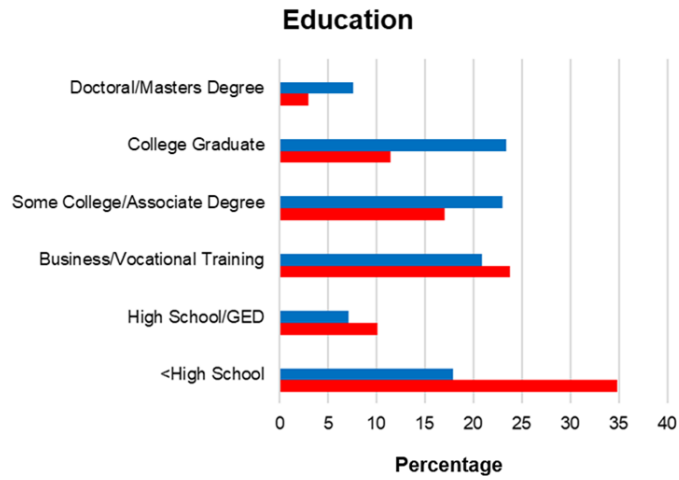**B**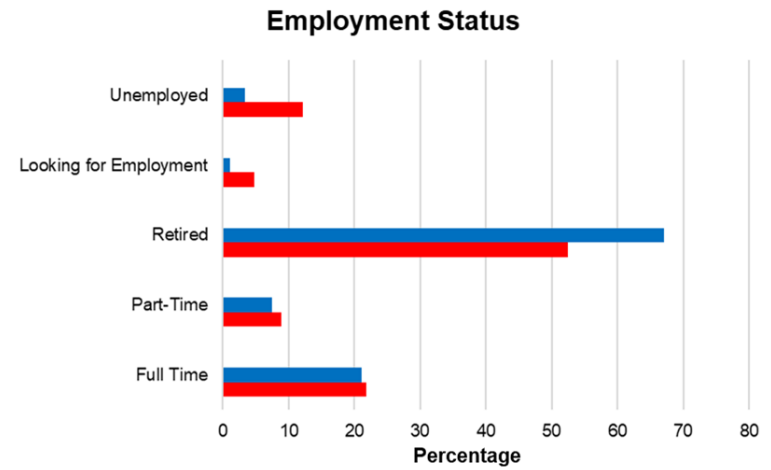**C**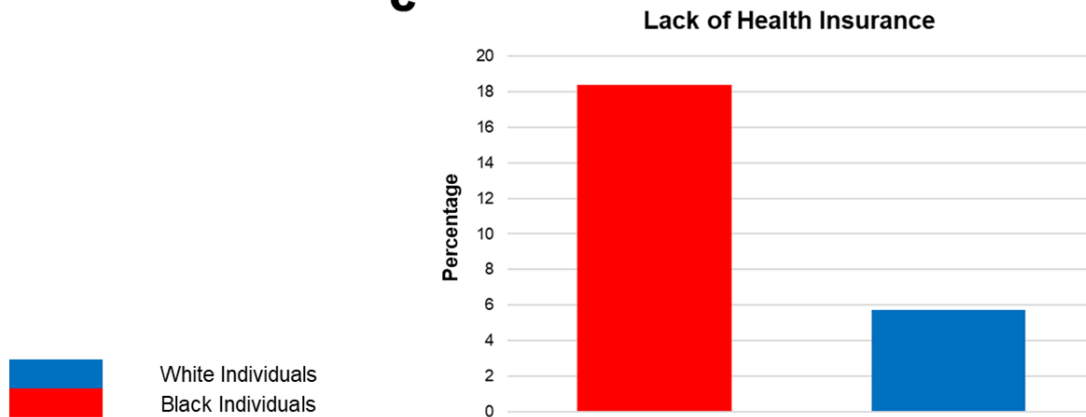

**Supplementary Figure II. Social Determinants of Health in White and Black Individuals**  
 P for education status<0.001. P for employment status<0.001. P for health insurance status<0.001.

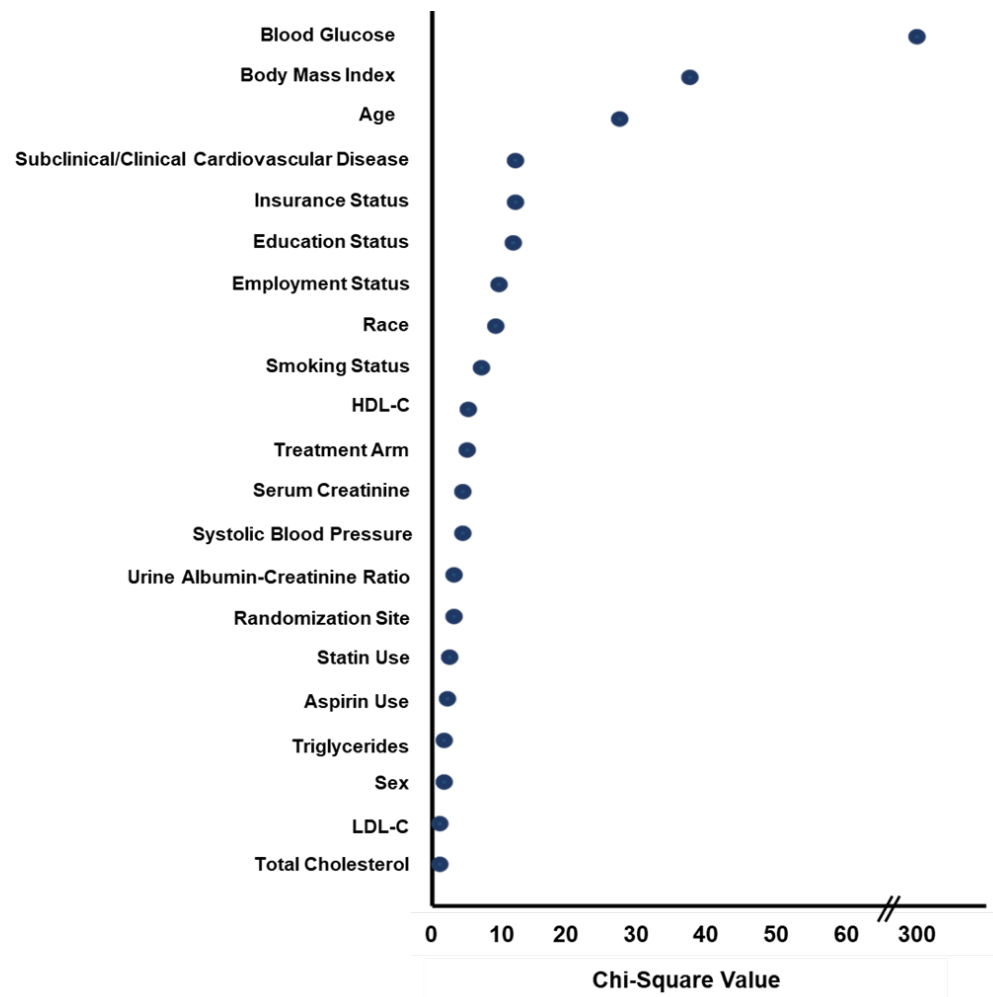

**Supplementary Figure III. Relative Strength of Association Between Incident Diabetes and Clinical and Demographic Factors Among White and Black Individuals (Combined).** This figure depicts the relative strength of association of the respective covariates, which are ranked according to the Chi-square values from the multivariable-adjusted Cox model. The Chi-square values are corrected for the degree of freedom to allow comparison on the same scale.

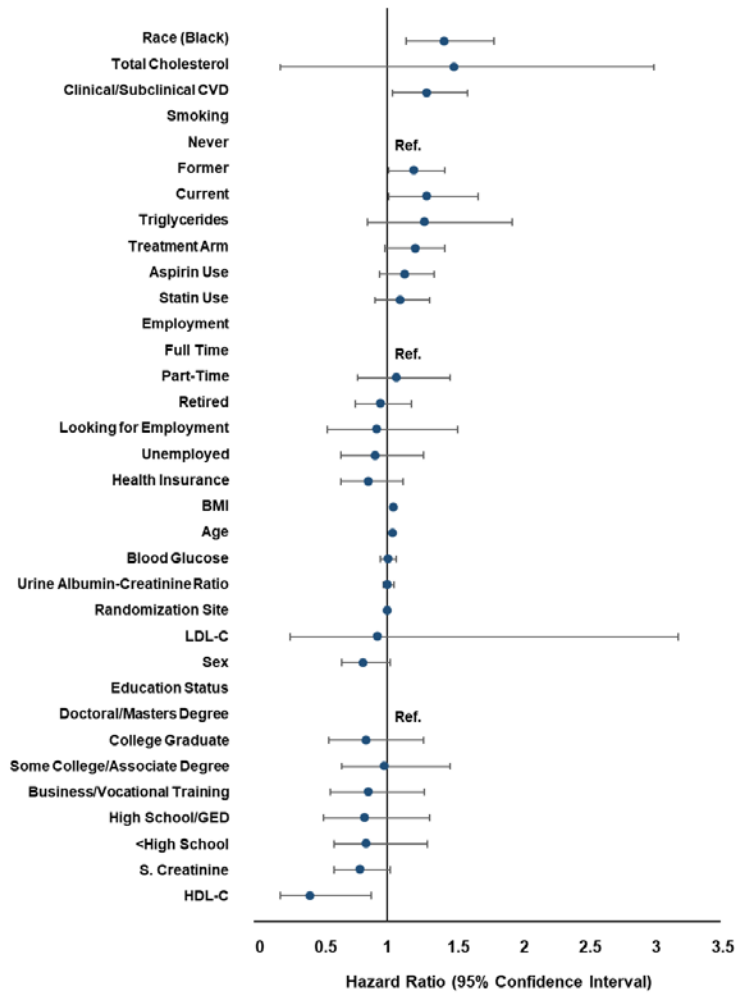

**Forest Plot of Predictors of Incident Diabetes**

**Supplementary Figure IV. Forest Plot of Predictors of Incident Diabetes Among White and Black Individuals.**

This figure depicts the parameter estimates of the individual variables included in the multivariable-adjusted Cox regression model.

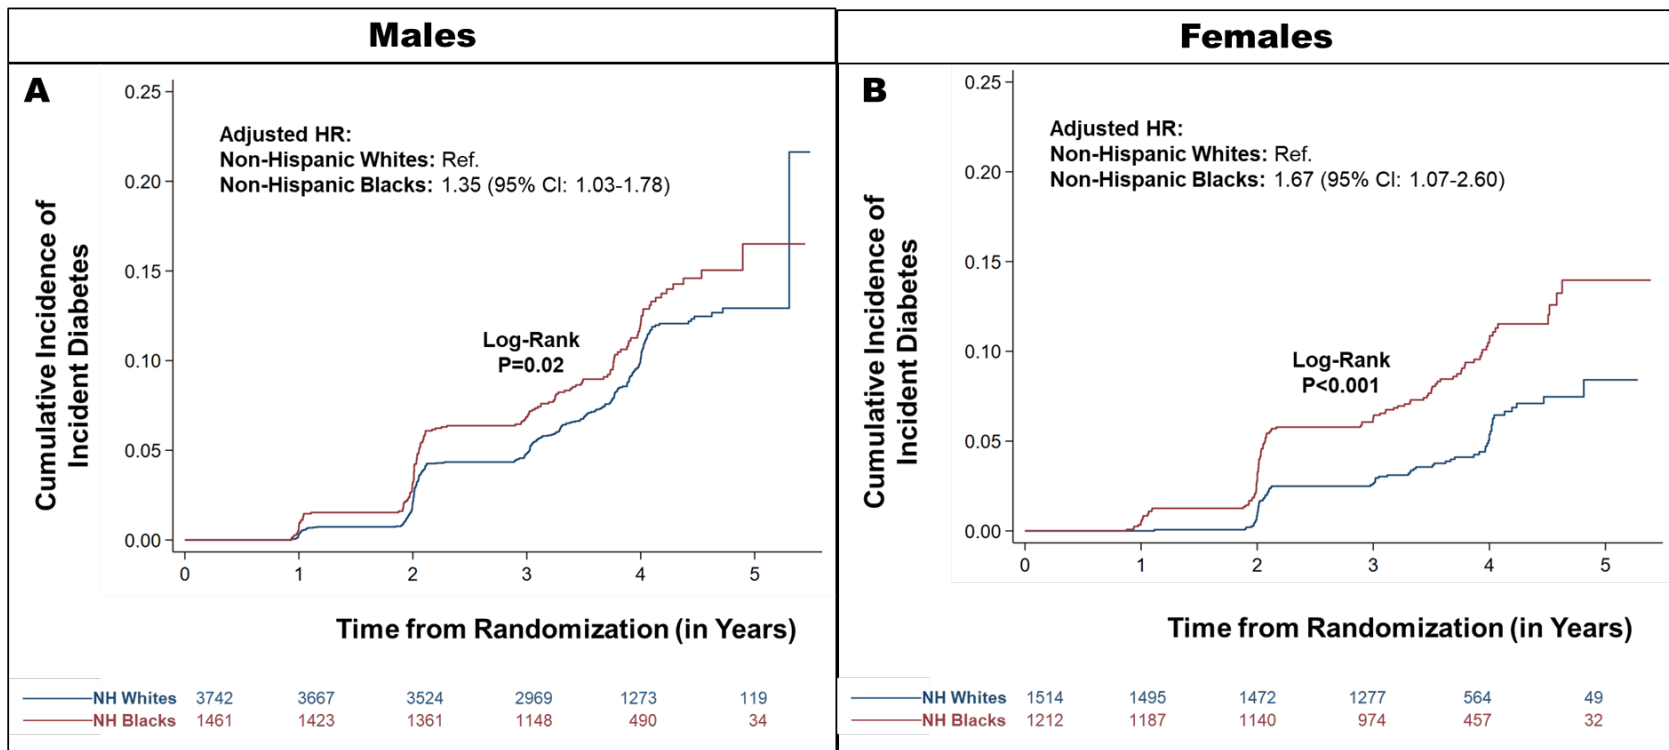

Supplementary Figure V. Risk of Incident Diabetes Mellitus: Stratified by Race and Sex

### Relationship of Baseline Blood Glucose, Body Mass Index, Systolic Blood Pressure, Diastolic Blood Pressure with European Ancestry Proportions

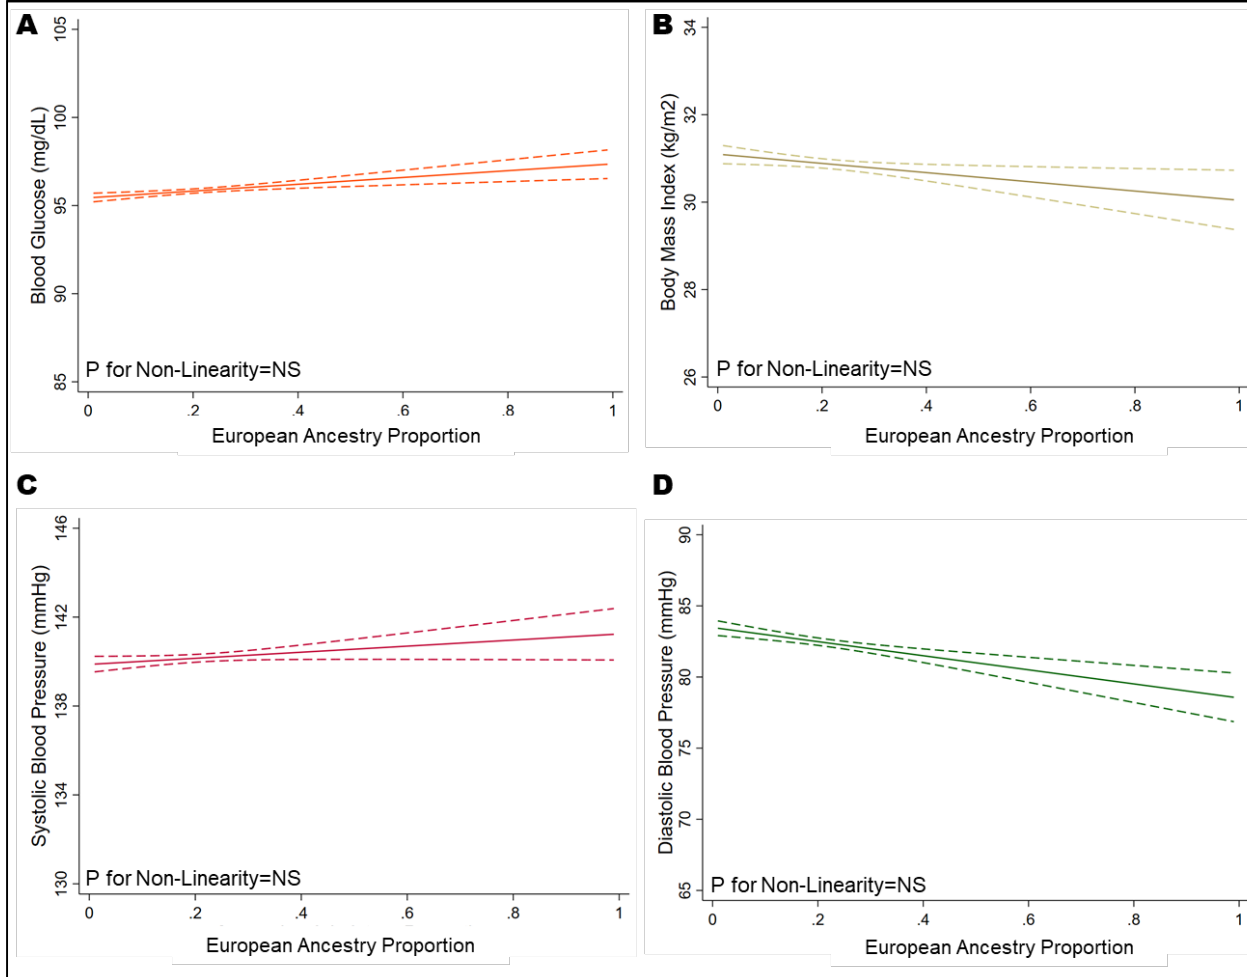

**Supplementary Figure VI. Relationship of Baseline Blood Glucose, Body Mass Index, Systolic Blood Pressure, Diastolic Blood Pressure with European Ancestry Proportion**

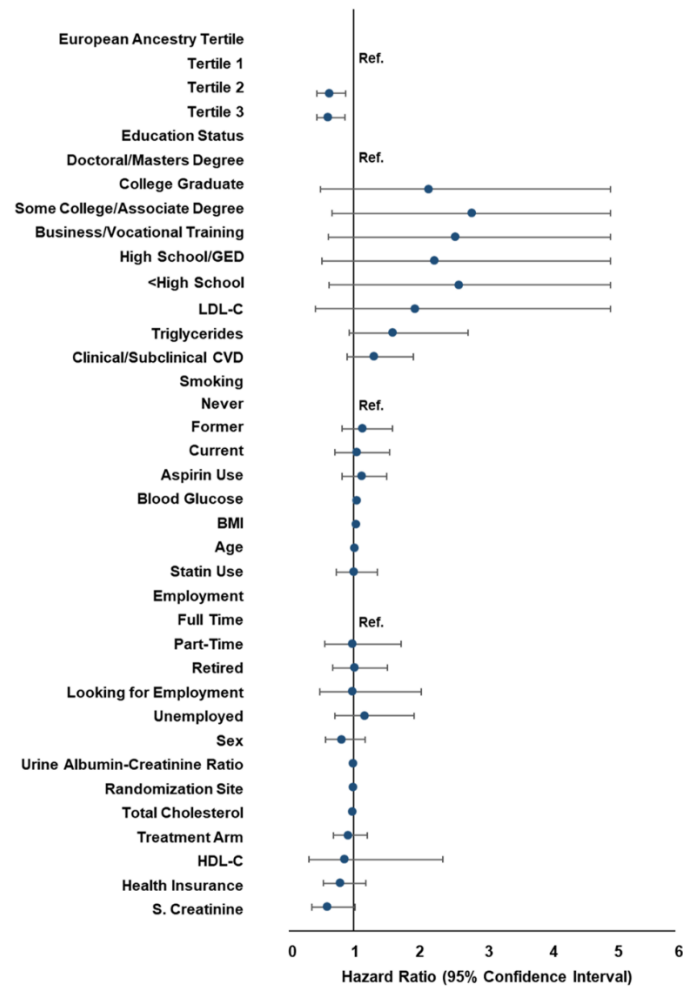

**Forest Plot of Predictors of Incident Diabetes Among Black Individuals**

**Supplementary Figure VII. Forest Plot of Predictors of Incident Diabetes Among Black Individuals.**

This figure depicts the parameter estimates of the individual variables included in the multivariable-adjusted Cox regression model.
